# Supplementary material for: Identification and Verification of Core Genes in Colorectal Cancer
Source: Biomed Res Int. 2020 May 8;2020:8082697. doi: 10.1155/2020/8082697 (PMC7232680; doi:10.1155/2020/8082697)
Supplement: Supplementary 1 — Table S1: detailed information regarding qRT-PCR primer of 10 core genes. [file 8082697.f1.xlsx]

## Sheet: Sheet1
Species	human
Sample source	tissue
gene name	primer sequence(5'to3')
SST	ACCCAACCAGACGGAGAATGA
	GCCGGGTTTGAGTTAGCAGA
PYY	GACGCCTACCCCATCAAACC
	CCGTCTCTTTTCCCATACCGC
CXCL1	GTGACAAATCCAACTGACC
	CTGTGTCTCTCTTTCCTCTTCT
CXCL8	ACTGAGAGTGATTGAGAGTGGAC
	AACCCTCTGCACCCAGTTTTC
CXCL3	CGCCCAAACCGAAGTCATAG
	GCTCCCCTTGTTCAGTATCTTTT
ZG16	GAGCGACTATGTGGGTGGTC
	CCACTTGTACTTCCCAGAAACC
AQP8	TGGACACTTCAACCCTGCG
	GCTGTGAGACCCAGTACGG
CLCA4	ATGGGAGGTGATTAGCAATTCTG
	CGATTTAGGCGGTCCTTACCC
MS4A12	AAGGAGCTTTCCCGTTGTCTG
	CACGGCCCAGTAGTCTTGG
GUCA2A	GCTGCTGGGAGTGGAGTA
	CTGGAGGAAATCGCTGAG
GAPDH	GGACCTGACCTGCCGTCTAG
	GTAGCCCAGGATGCCCTTGA
